# Supplementary material for: A Study of PLA Thin Film on SS 316L Coronary Stents Using a Dip Coating Technique
Source: MDPI journal article supplement (doi:10.3390/polym16020284), 2024-01-19
Supplement: s1 [file s1]

# Supplementary file

**Table S1.** Surface tension results of PLA solutions with different concentrations.

| PLA concentration (% ( <i>w/v</i> )) | Surface tension (mN m <sup>-1</sup> ) |
|--------------------------------------|---------------------------------------|
| 0.5                                  | 25.36 (± 0.14)                        |
| 1.0                                  | 25.33 (± 0.28)                        |
| 3.0                                  | 25.10 (± 0.27)                        |
| 5.0                                  | 25.23 (± 0.08)                        |
| 7.5                                  | 24.56 (± 0.46)                        |
| 10.0                                 | 25.27 (± 0.58)                        |
| 12.5                                 | 24.68 (± 0.08)                        |
| 15.0                                 | 26.17 (± 0.17)                        |

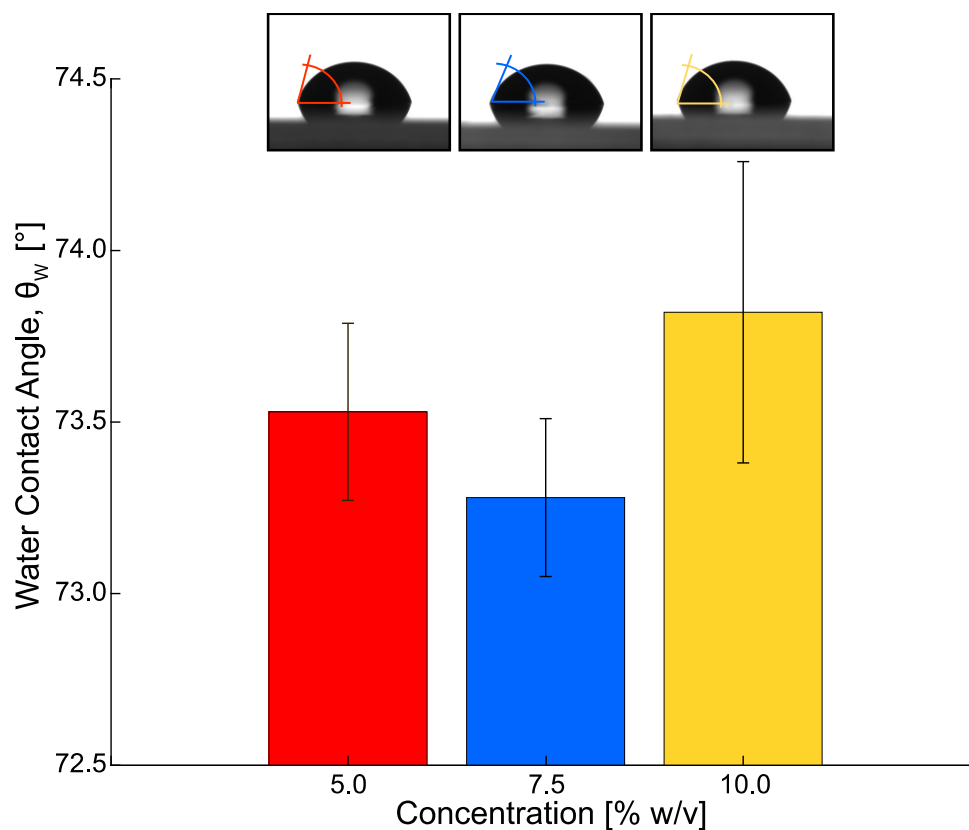

**Figure S1.** Average water contact angle for the three concentrations.
